# Supplementary material
Source: publisher figshare collection journal article supplement (https://gsapubs.figshare.com/ndownloader/files/23315246)
Supplement: Supplementary file 1 [file 23315246]

Qu, Y., et al., 2019, Evidence for molecular structural variations in the cytoarchitectures of a Jurassic plant: *Geology*, <https://doi.org/10.1130/G45725.1>

1     **1. Geological background**

2     **2. Methods**

3     **3. Description of the morphological and ultrastructural variations of organic**  
4     **matter in various stages of cell cycle based on optical microscopic images and**  
5     **Raman maps.**

6     **4. Fig. DR1 and caption**

7     **5. References of Data Repository**

8     **6. Table DR1**

9

10    **1. Geological background**

11       The Mesozoic strata at the Korsaröd locality, north of Höör in southern Sweden,  
12    represents a ‘Konservat-Lagerstätten’ deposit, hosting well-preserved fossilized plant  
13    material from a terrestrial ecosystem, including spore, pollen, charcoal, wood  
14    fragments with growth rings and saprophytic fungi (McLoughlin and Bomfleru, 2016;  
15    Vajda et al., 2016). The Jurassic Korsaröd successions record episodic lahar events,  
16    which partially preserved the vegetation of the contemporaneous ecosystem. In  
17    remarkable cases, the rapid calcite-permineralization by hydrothermal brines during  
18    volcanism has well-preserved the plant cytoarchitectures (Bomfleur et al., 2014; Vajda  
19    et al., 2016). The age of the strata is constrained to the Early Jurassic 191-176.7±0.5  
20    Ma, according to  $^{40}\text{Ar}/^{39}\text{Ar}$  estimates from adjacent basanite and nephelinite plugs  
21    (Bergelin et al., 2011; Tappe et al., 2016).

22

## 23    **2. Methods**

### 24    **Petrography and Raman Spectroscopy**

25        The petrographic and Raman spectroscopic analyses were performed on c. 40 µm  
26    thick polished thin sections of the fossil *Osmunda*, by using a A Horiba-Jobin Labram  
27    800 HR Raman spectrometer linked to an Olympus BX41 petrographic microscope at  
28    the Centre for Geobiology at University of Bergen, and a Renishaw InVia  
29    spectrometer linked to an Olympus BX61 confocal microscope at the Institut de  
30    Physique du Globe de Paris in Paris, respectively. For the Horiba-Jobin Labram 800  
31    HR spectrometer the Ar-ion laser with the wavelength of 514 nm, went through a  
32    density filter (D=0.3), an aperture hole of 100 µm in diameter, a 100× objective, and  
33    finally in a 1–2 µm spot on the sample with the final power of c. 0.2 mW (measured  
34    with a Coherent Lasercheck Analyser). For the Renishaw InVia Raman spectrometer  
35    exactly the same settings were applied, using a 514 nm laser with a 0.2 mW final  
36    power on the sample surface. In order to avoid polishing artifacts and potential  
37    contamination on the surface, we focused the laser beam on the carbonaceous material  
38    underneath polished surface of thin section. The spectra were acquired randomly from  
39    various cellular organelles in the range of 150–2000 cm<sup>-1</sup> using a running time of  
40    2×10 seconds. Some areas were scanned by using an XY stage with spatial resolution  
41    of 1 µm per step to generate two-dimensional maps of Raman spectral parameters. For  
42    Raman hyperspectral mapping each point analysis consisted of a running time of 1×5  
43    seconds. The final data were processed with the software ‘Lab Spec version 5.58.25’  
44    and Matlab version 7.13.0.564. The spectra were subtracted with a linear baseline

45 from 1000 to 1800  $\text{cm}^{-1}$  to remove the background fluorescence (Fig. 1D). The peak  
46 fitting were performed by peak deconvolution using a Gauss-Lorentzian function with  
47 100 iteration per fit.

48

#### 49 **micro-Fourier Transform Infrared spectroscopy (FTIR)**

50 The micro-FTIR analysis was performed on doubly polished wafers using an  
51 infrared microscope (Bruker Hyperion 3000) linked to a Bruker IFS66V FTIR  
52 spectrometer in transmission mode at Beamline D7 in the MAX-Lab ring of Maxlab  
53 in Lund, Sweden. The absorbance spectra were obtained by focusing the IR through a  
54  $15 \times 15 \mu\text{m}^2$  aperture on the targeted samples in the rock wafer on the  $\text{CaF}_2$  window.  
55 Reference background IR spectrum for calibration were measured on the  $\text{CaF}_2$   
56 window before the measurement of every sample. The FTIR spectrum acquisition has  
57 been performed randomly from various cellular organelles. The spectra in the range  
58 from 500 to 7500  $\text{cm}^{-1}$  were obtained by the integration of 256 scans, and processed  
59 with the software Lab Spec version 5.58.25 and Matlab version 7.13.0.564.

60

#### 61 **SIMS (Secondary Ion Mass Spectrometry)**

62 The *in-situ* isotopic analyses of the extant and fossil ferns were performed by  
63 using a Cameca IMS 1280 (Secondary ion mass spectrometry) at the Swedish  
64 Museum of Natural History in Stockholm (NORDSIM Laboratory). Slices from the  
65 fossil Royal fern stem (rhizome) were cut from polished discs, whereas the fresh  
66 slices from the extant Royal fern rhizome were first soaked in  $\text{Na}_2\text{SiO}_3$  and solidified

67 in the air (reaction:  $\text{Na}_2\text{SiO}_3 + \text{CO}_2 = \text{SiO}_2 + \text{Na}_2\text{CO}_3$ ). Both the fossil and the extant  
68 Royal fern samples were mounted together with a graphite standard of pyrolytic  
69 graphite ('C-pyr' which has  $\delta^{13}\text{C} = -31\text{‰}$  in VPDB) in epoxy, and subsequently  
70 polished and coated with a c. 30 nm gold layer to provide conductivity. A 20 kV  
71 impact energy  $\text{Cs}^+$  beam was focused to a 5–10  $\mu\text{m}$  spot, and meanwhile a low energy  
72 electron flooding gun was used to compensate for charge build-up. Measurements  
73 were made in high transmission transfer mode with simultaneous determination of the  
74  $^{12}\text{C}$  and  $^{13}\text{C}$  signals in a Faraday cup and low-noise ion counting electron multiplier,  
75 respectively, the latter of which was operated at mass resolution of  $M/\text{DM}=6000$  to  
76 separate  $^{13}\text{C}^-$  from  $^{12}\text{C}^1\text{H}^-$ , and  $M/\text{DM}=12000$  to separate  $^{11}\text{B}^{16}\text{O}$  from  $^{13}\text{C}^{14}\text{N}$  at mass  
77 27. Measurements were performed randomly from various cellular organelles. Carbon  
78 isotopic data were calibrated using the graphite standard and are reported as ‰  
79 deviation from VPDB. In order to avoid analytical artifacts, we excluded all sample  
80 data points with excessively low  $^{12}\text{C}$  count rate (defined as ion counts per second)  
81 relative to that of the bracketing graphite standards. When all  $\delta^{13}\text{C}_{\text{org-SIMS}}$  data are  
82 plotted against  $^{12}\text{C}$  count ratio ( $^{12}\text{C}$  count rate sample/standard), anomalous points  
83 with strongly deviating  $\delta^{13}\text{C}$  values are observed for count ratios lower than 0.07 (Fig.  
84 DR1). These points with low  $^{12}\text{C}$  count ratio represent spots with a small fraction of  
85 total organic material, and have therefore been excluded from our interpretation. This  
86 cut off is arbitrary, but in the same range as used in other studies (e.g. Morag et al.,  
87 2016; Wacey et al., 2011).

### 89    **Analysis of carbon isotopic composition of organic carbon from bulk samples**

90        The carbon isotopic analyses on organic carbon in both fossil and extant Royal  
91    fern samples were carried out at the University of Bergen using an Elemental  
92    Analyser Continuous Flow Isotope Ratio Mass Spectrometry (EA-CF-IRMS:  
93    ThermoScientific Delta V Plus with Costech EA). The weathered surfaces of rock  
94    pieces were cut off to avoid potential contamination. The powdered samples from  
95    bulk rock were rinsed with (ethanol/dichloromethane = 1:9 volume ratio) to remove  
96    possible organic contamination during crushing before evaporated in room  
97    temperature. The powdered samples were used for carbon isotopic analysis on organic  
98    carbon, and decarbonated using 37% (volume ratio) HCl at 70°C for 48 hours and  
99    subsequently rinsed three times by deionized water and dried at room temperature.  
100    The  $\delta^{13}\text{C}$  of carbonate and organic matter are reported relative to the VPDB standard  
101    (Standard Deviation < 0.04 ‰), and the appropriate correction factors were applied.

102

### 103    **3. Description of the morphological and ultrastructural variations of organic** 104    **matter in various stages of cell cycle based on optical microscopic images and** 105    **Raman maps.**

106        During the interphase stage, the nucleolus (arrow in Fig. 1E) appears with a clear  
107    boundary in the nucleus, whereas the chromatin in the nuclear matrix is difficult to  
108    identify by optical microscopy (Fig. 1E). The Raman spectra show that the nucleolus  
109    is less structurally ordered (lower I-1350/1600) compared to the ambient nuclear  
110    matrix, which is well packed by the smooth nuclear envelope. In the prophase, the

111 nucleolus disintegrates, and the nuclear envelope starts to crack (Fig. 1J). The  
112 chromatin starts to convert into chromosomes, which distribute randomly in the  
113 nuclear matrix (Fig. 1J). The chromosomes contain higher concentration of organic  
114 carbon (higher I-1600) and higher structural order (higher I-1350/1600) than the  
115 nuclear matrix (Fig. 1J). In the prometaphase, the chromosomes continue  
116 concentrating in specific areas in the nucleus, where the structural order of carbon is  
117 slightly higher (higher I-1350/1600) than the nuclear matrix (Figs. 2K–L). In the  
118 metaphase, the condensed chromosomes gradually gather near the equator in the  
119 center of the nucleus (Fig. 1M) and the structural order of carbon is higher (higher  
120 I-1350/1600) in the chromosomes than that in the nuclear matrix (Fig. 1M). In the  
121 anaphase, the chromosomes/chromatids split and move towards the opposite sides  
122 (arrows) of the cell and display lower structural order (lower I-1350/1600) of carbon  
123 compared to the nuclear matrix (Fig. 1N). In the telophase, the cell plate forms in the  
124 center (dashed line) and divides the protoplasm into two separate subsequent daughter  
125 cells (Fig. 1H). The structural order of carbon in the cell plate is similar to that of  
126 the cell wall but higher (higher I-1350/1600) than that in the split protoplasm (Fig.  
127 1H). During cytokinesis, the formation of two daughter nuclei is completed, and the  
128 protoplasm is gradually separated into two parts by the furrow (arrows) in the equator  
129 (Fig. 1F). A nucleolus with a smudged envelope is visible, in which the carbon is less  
130 ordered (lower I-1350/1600) than that in the nucleus matrix, whereas the carbon in  
131 cytoplasm has higher structural order (higher I-1350/1600) than that in the nucleus  
132 and cell wall (Fig. 1F).

133

#### 134 **4. Caption of Fig. DR1**

135 **Fig. DR1:** Plots of all  $\delta^{13}\text{C}_{\text{org-SIMS}}$  data obtained from both fossil and extant fern. The  
136 data on the left side of the dashed line ( $^{12}\text{C}$  count of sample vs. standard less than 7%)  
137 are excluded from our interpretation in order to avoid artifacts, as explained in the  
138 Methods section. The raw data are provided in Table DR. 1.

139

#### 140 **5. References of Data Repository**

141 Bergelin, I., Obst, K., Söderlund, U., Larsson, K., and Johansson, L., 2011, Mesozoic  
142 rift magmatism in the North Sea region:  $^{40}\text{Ar}/^{39}\text{Ar}$  geochronology of Scanian  
143 basalts and geochemical constraints: International Journal of Earth Sciences, v. 100,  
144 p. 787-804.

145 Bomfleur, B., McLoughlin, S., and Vajda, V., 2014, Fossilized nuclei and  
146 chromosomes reveal 180 million years of genomic stasis in royal ferns: Science, v.  
147 343, p. 1376-1377.

148 McLoughlin, S. and Bomfleur, B. 2016., Biotic interactions in an exceptionally well  
149 preserved osmundaceous fern rhizome from the Early Jurassic of Sweden.  
150 Palaeogeography, Palaeoclimatology, Palaeoecology, v. 464, p. 86–96.

151 Morag, N., Williford, K.H., Kitajima, K., Philippot, P., Van Kranendonk, M.J., Lepot,  
152 K., Thomazo, C., Valley, J.W. (2016) Microstructure-specific carbon isotopic  
153 signatures of organic matter from ~3.5 Ga cherts of the Pilbara Craton support a  
154 biologic origin. Precambrian Research v. 275, p. 429-449.

155 Vajda, V., Linderson, H., and McLoughlin, S., 2016, Disrupted vegetation as a  
156 response to Jurassic volcanism in southern Sweden: Geological Society, London,

157 Special Publications, v. 434, p. 127-147.

158 Tappe, S., Smart, K.A., Stracke, A., Romer, R.L., Prelević, D., and van den Bogaard,  
159 P., 2016, Melt evolution beneath a rifted craton edge:  $^{40}\text{Ar}/^{39}\text{Ar}$  geochronology  
160 and Sr–Nd–Hf–Pb isotope systematics of primitive alkaline basalts and  
161 lamprophyres from the SW Baltic Shield: *Geochimica et Cosmochimica Acta*, v.  
162 173, p. 1-36.

163 Wacey, D., Kilburn, M.R., Saunders, M., Cliff, J., Brasier, M.D. (2011) Microfossils  
164 of sulfur-metabolizing cells in 3.4-billion-year-old rocks of Western Australia.  
165 *Nature Geoscience* v. 4, p. 698-702.

166

167

168

169

170

171

172

173

174

175

176

177

178

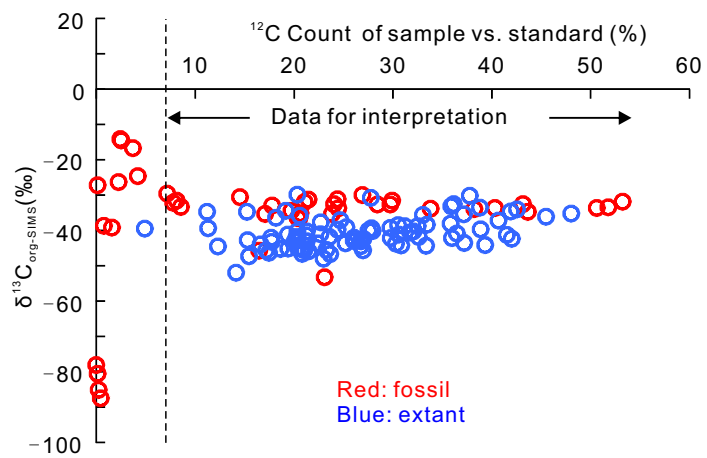

Fig. DR1

1 **Table DR1:** Summary of  $\delta^{13}\text{C}_{\text{org-SIMS}}$  data with count ratios. Abbreviations:  
2 RFF=Royal fern fossil, RFM=Royal fern modern, IP=Intensity of primary ion,  
3 cps=count per second. Classification: STD=Standard, 1=Cell wall in pith, 2=Nuclei in  
4 inner cortex, 3=Cytoplasm in inner cortex, 4=Cell wall in inner cortex, 5=Cytoplasm  
5 in outer cortex, 6=Cell wall in outer cortex. Note: some IP values (shown as blanks)  
6 were not recorded due to software problem. The underlines represent the data with  $^{12}\text{C}$   
7 counts of sample vs. STD <0.07, which are excluded from further consideration in  
8 order to avoid artifacts.

| Sample ID      | IP<br>(nA)   | $^{12}\text{C}$ cps<br>( $\times 10^9$ ) | $^{12}\text{C}$ cps<br>sample vs.<br>STD | $^{13}\text{C}/^{12}\text{C}$ drift<br>corrected<br>( $\times 10^{-2}$ ) | $\pm$ abs<br>( $10^{-5}$ ) | $\delta^{13}\text{C}$ (‰ in PDB)    | Classification |
|----------------|--------------|------------------------------------------|------------------------------------------|--------------------------------------------------------------------------|----------------------------|-------------------------------------|----------------|
| 0519@1         | 0.294        | 0.07                                     |                                          | 1.05                                                                     | 0.015                      | $-30.65 \pm 0.28$                   | STD            |
| 0519@2         | 0.293        | 0.07                                     |                                          | 1.05                                                                     | 0.013                      | $-30.87 \pm 0.27$                   | STD            |
| 0519@3         | 0.293        | 0.07                                     |                                          | 1.05                                                                     | 0.013                      | $-31.21 \pm 0.27$                   | STD            |
| RFF_@1         | 0.292        | 0.02                                     | 0.24                                     | 1.05                                                                     | 0.026                      | $-31.22 \pm 0.35$                   | 6              |
| RFF_@02        | 0.291        | 0.01                                     | 0.21                                     | 1.05                                                                     | 0.034                      | $-31.38 \pm 0.40$                   | 6              |
| RFF_@03        | 0.290        | 0.03                                     | 0.40                                     | 1.04                                                                     | 0.022                      | $-33.72 \pm 0.32$                   | 6              |
| RFF_@04        | 0.289        | 0.03                                     | 0.38                                     | 1.04                                                                     | 0.023                      | $-34.00 \pm 0.33$                   | 6              |
| RFF_@05        | 0.288        | 0.03                                     | 0.43                                     | 1.04                                                                     | 0.019                      | $-32.69 \pm 0.31$                   | 6              |
| RFF_@06        | 0.287        | 0.03                                     | 0.51                                     | 1.04                                                                     | 0.025                      | $-33.71 \pm 0.34$                   | 6              |
| <u>RFF_@07</u> | <u>0.286</u> | <u>0.00</u>                              | <u>0.02</u>                              | <u>1.04</u>                                                              | <u>0.113</u>               | <u><math>-39.28 \pm 1.11</math></u> | <u>6</u>       |
| RFF_@08        | 0.286        | 0.01                                     | 0.21                                     | 1.05                                                                     | 0.030                      | $-32.10 \pm 0.38$                   | 6              |

|                |              |             |             |             |               |                       |          |
|----------------|--------------|-------------|-------------|-------------|---------------|-----------------------|----------|
| 0519@4         | 0.285        | 0.07        |             | 1.05        | 0.015         | -31.88±0.28           | STD      |
| 0519@5         | 0.284        | 0.07        |             | 1.05        | 0.013         | -31.13±0.27           | STD      |
| RFF_@09        | 0.284        | 0.02        | 0.24        | 1.04        | 0.026         | -35.39±0.35           | 6        |
| RFF_@10        | 0.283        | 0.01        | 0.09        | 1.04        | 0.044         | -33.42±0.48           | 6        |
| <u>RFF_@11</u> | <u>0.282</u> | <u>0.00</u> | <u>0.00</u> | <u>1.62</u> | <u>2.572</u>  | <u>503.46±24.58</u>   | <u>2</u> |
| <u>RFF_@12</u> | <u>0.282</u> | <u>0.00</u> | <u>0.00</u> | <u>0.99</u> | <u>0.293</u>  | <u>-87.59±2.81</u>    | <u>2</u> |
| <u>RFF_@13</u> | <u>0.282</u> | <u>0.00</u> | <u>0.00</u> | <u>2.26</u> | <u>8.983</u>  | <u>1089.53±85.85</u>  | <u>2</u> |
| <u>RFF_@14</u> | <u>0.281</u> | <u>0.00</u> | <u>0.00</u> | <u>1.17</u> | <u>1.113</u>  | <u>84.92±10.64</u>    | <u>2</u> |
| <u>RFF_@15</u> | <u>0.281</u> | <u>0.00</u> | <u>0.00</u> | <u>1.73</u> | <u>5.180</u>  | <u>601.96±49.50</u>   | <u>2</u> |
| <u>RFF_@16</u> | <u>0.280</u> | <u>0.00</u> | <u>0.00</u> | <u>2.69</u> | <u>14.047</u> | <u>1494.30±134.24</u> | <u>2</u> |
| 0519@6         | 0.280        | 0.07        |             | 1.05        | 0.018         | -30.55±0.30           | STD      |
| 0519@7         | 0.280        | 0.07        |             | 1.05        | 0.013         | -30.93±0.27           | STD      |
| <u>RFF_@17</u> | <u>0.280</u> | <u>0.00</u> | <u>0.07</u> | <u>1.00</u> | <u>0.202</u>  | <u>-78.24±1.95</u>    | <u>4</u> |
| <u>RFF_@18</u> | <u>0.279</u> | <u>0.00</u> | <u>0.00</u> | <u>1.72</u> | <u>3.016</u>  | <u>595.31±28.82</u>   | <u>3</u> |
| RFF_@19        | 0.279        | 0.01        | 0.17        | 1.03        | 0.041         | -45.86±0.46           | 4        |
| <u>RFF_@20</u> | <u>0.278</u> | <u>0.00</u> | <u>0.02</u> | <u>1.05</u> | <u>0.093</u>  | <u>-26.37±0.92</u>    | <u>4</u> |
| RFF_@21        | 0.278        | 0.01        | 0.18        | 1.04        | 0.033         | -33.05±0.40           | 2        |
| RFF_@22        | 0.278        | 0.03        | 0.52        | 1.04        | 0.018         | -33.52±0.30           | 4        |
| <u>RFF_@23</u> | <u>0.278</u> | <u>0.00</u> | <u>0.00</u> | <u>0.99</u> | <u>0.340</u>  | <u>-85.22±3.26</u>    | <u>4</u> |
| RFF_@24        | 0.278        | 0.03        | 0.44        | 1.04        | 0.019         | -34.81±0.31           | 4        |
| 0519@8         | 0.277        | 0.07        |             | 1.05        | 0.014         | -31.22±0.28           | STD      |
| 0519@9         | 0.277        | 0.07        |             | 1.05        | 0.016         | -31.08±0.29           | STD      |
| <u>RFF_@25</u> | <u>0.277</u> | <u>0.00</u> | <u>0.00</u> | <u>0.99</u> | <u>1.073</u>  | <u>-80.67±10.25</u>   | <u>2</u> |

|                |              |             |             |             |               |                       |          |
|----------------|--------------|-------------|-------------|-------------|---------------|-----------------------|----------|
| <u>RFF @26</u> | <u>0.277</u> | <u>0.00</u> | <u>0.00</u> | <u>1.59</u> | <u>3.653</u>  | <u>472.10±34.91</u>   | <u>2</u> |
| <u>RFF @27</u> | <u>0.276</u> | <u>0.00</u> | <u>0.00</u> | <u>2.01</u> | <u>3.722</u>  | <u>863.20±35.57</u>   | <u>2</u> |
| <u>RFF @28</u> | <u>0.276</u> | <u>0.00</u> | <u>0.00</u> | <u>1.62</u> | <u>1.225</u>  | <u>500.15±11.71</u>   | <u>2</u> |
| <u>RFF @29</u> | <u>0.275</u> | <u>0.00</u> | <u>0.00</u> | <u>1.38</u> | <u>1.204</u>  | <u>274.28±11.51</u>   | <u>2</u> |
| <u>RFF @30</u> | <u>0.275</u> | <u>0.00</u> | <u>0.00</u> | <u>1.22</u> | <u>2.062</u>  | <u>131.19±19.71</u>   | <u>2</u> |
| <u>RFF @31</u> | <u>0.275</u> | <u>0.00</u> | <u>0.00</u> | <u>1.22</u> | <u>1.208</u>  | <u>129.49±11.55</u>   | <u>2</u> |
| <u>RFF @32</u> | <u>0.274</u> | <u>0.00</u> | <u>0.00</u> | <u>1.05</u> | <u>0.617</u>  | <u>-27.33±5.90</u>    | <u>2</u> |
| 0519@10        | 0.274        | 0.06        |             | 1.05        | 0.018         | -30.70±0.30           | STD      |
| 0519@11        | 0.274        | 0.07        |             | 1.05        | 0.013         | -31.07±0.27           | STD      |
| <u>RFF @33</u> | <u>0.273</u> | <u>0.00</u> | <u>0.00</u> | <u>1.35</u> | <u>2.646</u>  | <u>245.94±25.29</u>   | <u>2</u> |
| <u>RFF @34</u> | <u>0.273</u> | <u>0.00</u> | <u>0.00</u> | <u>2.16</u> | <u>7.825</u>  | <u>1004.41±74.78</u>  | <u>2</u> |
| <u>RFF @35</u> | <u>0.272</u> | <u>0.00</u> | <u>0.01</u> | <u>1.04</u> | <u>1.155</u>  | <u>-38.82±11.04</u>   | <u>2</u> |
| <u>RFF @36</u> | <u>0.272</u> | <u>0.00</u> | <u>0.00</u> | <u>1.66</u> | <u>3.309</u>  | <u>540.88±31.62</u>   | <u>2</u> |
| <u>RFF @37</u> | <u>0.272</u> | <u>0.00</u> | <u>0.07</u> | <u>0.93</u> | <u>0.442</u>  | <u>-138.19±4.22</u>   | <u>2</u> |
| <u>RFF @38</u> | <u>0.271</u> | <u>0.00</u> | <u>0.00</u> | <u>2.25</u> | <u>9.515</u>  | <u>1086.05±90.93</u>  | <u>2</u> |
| <u>RFF @39</u> | <u>0.271</u> | <u>0.00</u> | <u>0.00</u> | <u>1.48</u> | <u>5.309</u>  | <u>374.66±50.73</u>   | <u>2</u> |
| <u>RFF @40</u> | <u>0.270</u> | <u>0.00</u> | <u>0.00</u> | <u>0.90</u> | <u>0.199</u>  | <u>-166.92±1.92</u>   | <u>2</u> |
| 0519@12        | 0.270        | 0.06        |             | 1.05        | 0.019         | -31.40±0.30           | STD      |
| 0519@13        | 0.269        | 0.06        |             | 1.05        | 0.018         | -31.10±0.30           | STD      |
| <u>RFF @41</u> | <u>0.269</u> | <u>0.00</u> | <u>0.00</u> | <u>1.80</u> | <u>3.920</u>  | <u>663.77±37.46</u>   | <u>2</u> |
| <u>RFF @42</u> | <u>0.268</u> | <u>0.00</u> | <u>0.00</u> | <u>1.85</u> | <u>6.100</u>  | <u>711.99±58.29</u>   | <u>2</u> |
| <u>RFF @43</u> | <u>0.268</u> | <u>0.00</u> | <u>0.00</u> | <u>1.79</u> | <u>8.511</u>  | <u>661.13±81.34</u>   | <u>2</u> |
| <u>RFF @44</u> | <u>0.267</u> | <u>0.00</u> | <u>0.00</u> | <u>3.12</u> | <u>15.334</u> | <u>1889.39±146.54</u> | <u>2</u> |

|                |       |             |             |             |              |                    |          |
|----------------|-------|-------------|-------------|-------------|--------------|--------------------|----------|
| RFF_@45        | 0.267 | 0.01        | 0.21        | 1.04        | 0.029        | -36.58±0.37        | 1        |
| RFF_@46        | 0.267 | 0.01        | 0.20        | 1.04        | 0.030        | -34.53±0.37        | 1        |
| RFF_@47        | 0.266 | 0.01        | 0.15        | 1.05        | 0.035        | -30.72±0.42        | 1        |
| RFF_@48        | 0.266 | 0.01        | 0.17        | 1.04        | 0.032        | -35.40±0.39        | 1        |
| 0519@14        | 0.266 | 0.06        |             | 1.05        | 0.013        | -30.81±0.28        | STD      |
| 0519@15        | 0.266 | 0.06        |             | 1.05        | 0.013        | -31.26±0.27        | STD      |
| RFF_@49        | 0.265 | 0.01        | 0.21        | 1.04        | 0.032        | -35.25±0.39        | 1        |
| RFF_@50        | 0.265 | 0.01        | 0.23        | 1.02        | 0.069        | -53.36±0.70        | 1        |
| RFF_@51        | 0.265 | 0.02        | 0.24        | 1.04        | 0.027        | -32.60±0.35        | 4        |
| RFF_@52        | 0.264 | 0.02        | 0.25        | 1.04        | 0.026        | -33.79±0.35        | 4        |
| RFF_@53        |       | 0.02        | 0.34        | 1.04        | 0.023        | -33.90±0.32        | 4        |
| RFF_@54        |       | 0.03        | 0.53        | 1.05        | 0.018        | -31.99±0.30        | 4        |
| <u>RFF_@55</u> |       | <u>0.00</u> | <u>0.04</u> | <u>1.06</u> | <u>0.071</u> | <u>-16.78±0.72</u> | <u>2</u> |
| RFF_@56        |       | 0.02        | 0.27        | 1.05        | 0.027        | -30.11±0.35        | 4        |
| 0519@16        |       | 0.08        |             | 1.05        | 0.013        | -29.89±0.27        | STD      |
| 0519@17        |       | 0.08        |             | 1.05        | 0.013        | -30.66±0.28        | STD      |
| <u>RFF_@57</u> |       | <u>0.00</u> | <u>0.03</u> | <u>1.06</u> | <u>0.096</u> | <u>-14.61±0.95</u> | <u>2</u> |
| RFF_@58        |       | 0.02        | 0.28        | 1.04        | 0.026        | -32.79±0.35        | 4        |
| <u>RFF_@59</u> |       | <u>0.00</u> | <u>0.04</u> | <u>1.05</u> | <u>0.061</u> | <u>-24.70±0.63</u> | <u>2</u> |
| RFF_@60        |       | 0.02        | 0.30        | 1.05        | 0.026        | -31.70±0.35        | 4        |
| RFF_@61        |       | 0.01        | 0.07        | 1.05        | 0.044        | -29.66±0.48        | 2        |
| RFF_@62        |       | 0.01        | 0.08        | 1.05        | 0.042        | -32.28±0.47        | 2        |
| 0519@18        |       | 0.08        |             | 1.05        | 0.016        | -30.80±0.29        | STD      |

|                |             |             |              |               |                                        |          |
|----------------|-------------|-------------|--------------|---------------|----------------------------------------|----------|
| 0519@19        | 0.08        |             | 1.05         | 0.016         | $-30.87 \pm 0.29$                      | STD      |
| RFF_@63        | 0.02        | 0.30        | 1.04         | 0.026         | $-32.74 \pm 0.35$                      | 4        |
| <u>RFF_@64</u> | <u>0.00</u> | <u>0.02</u> | <u>1.06</u>  | <u>0.092</u>  | <u><math>-14.24 \pm 0.91</math></u>    | <u>2</u> |
| RFF_@65        | 0.01        | 0.08        | 1.05         | 0.042         | $-31.65 \pm 0.47$                      | 2        |
| RFF_@66        | 0.02        | 0.20        | 1.04         | 0.034         | $-36.66 \pm 0.40$                      | 4        |
| 0519@20        | 0.08        |             | 1.05         | 0.017         | $-31.21 \pm 0.29$                      | STD      |
| 0519@21        | 0.08        |             | 1.05         | 0.014         | $-31.14 \pm 0.28$                      | STD      |
| 0520@1         | 0.07        |             | 1.05         | 0.018         | $-30.75 \pm 0.40$                      | STD      |
| 0520@2         | 0.07        |             | 1.05         | 0.014         | $-31.51 \pm 0.39$                      | STD      |
| 0520@3         | 0.07        |             | 1.05         | 0.013         | $-31.12 \pm 0.38$                      | STD      |
| <u>RFM@1</u>   | <u>0.00</u> | <u>0.00</u> | <u>-2.40</u> | <u>-1.751</u> | <u><math>-3213.74 \pm 16.68</math></u> | <u>1</u> |
| RFM@02         | 0.00        | 0.05        | 1.04         | 0.057         | $-39.61 \pm 0.65$                      | 1        |
| RFM@03         | 0.01        | 0.18        | 1.04         | 0.035         | $-42.20 \pm 0.49$                      | 1        |
| RFM@04         | 0.02        | 0.23        | 1.04         | 0.026         | $-37.85 \pm 0.44$                      | 1        |
| RFM@05         | 0.01        | 0.11        | 1.04         | 0.037         | $-39.45 \pm 0.51$                      | 1        |
| RFM@06         | 0.01        | 0.11        | 1.05         | 0.038         | $-34.82 \pm 0.51$                      | 1        |
| RFM@07         | 0.01        | 0.19        | 1.05         | 0.029         | $-34.57 \pm 0.45$                      | 1        |
| RFM@08         | 0.02        | 0.27        | 1.04         | 0.025         | $-43.19 \pm 0.43$                      | 4        |
| 0520@4         | 0.07        |             | 1.05         | 0.013         | $-30.61 \pm 0.38$                      | STD      |
| 0520@5         | 0.07        |             | 1.05         | 0.013         | $-30.76 \pm 0.38$                      | STD      |
| RFM@09         | 0.02        | 0.33        | 1.04         | 0.022         | $-44.46 \pm 0.42$                      | 4        |
| RFM@10         | 0.03        | 0.39        | 1.04         | 0.020         | $-44.28 \pm 0.41$                      | 4        |

|        |      |      |      |       |                   |         |
|--------|------|------|------|-------|-------------------|---------|
| RFM@11 | 0.01 | 0.21 | 1.03 | 0.028 | $-46.71 \pm 0.45$ | 4       |
| RFM@12 | 0.02 | 0.31 | 1.04 | 0.028 | $-41.30 \pm 0.45$ | 4       |
| RFM@13 | 0.03 | 0.38 | 1.05 | 0.026 | $-30.23 \pm 0.44$ | 4       |
| RFM@14 | 0.01 | 0.12 | 1.04 | 0.036 | $-44.61 \pm 0.50$ | 4       |
| RFM@15 | 0.01 | 0.21 | 1.05 | 0.042 | $-35.93 \pm 0.54$ | 4       |
| 0520@6 | 0.06 |      | 1.05 | 0.013 | $-30.65 \pm 0.39$ | STD     |
| 0520@7 | 0.07 |      | 1.05 | 0.013 | $-30.98 \pm 0.38$ | STD     |
| RFM@16 | 0.01 | 0.20 | 1.05 | 0.028 | $-30.02 \pm 0.45$ | 4       |
| RFM@17 | 0.02 | 0.28 | 1.05 | 0.024 | $-30.84 \pm 0.43$ | 4       |
| RFM@18 | 0.01 | 0.15 | 1.05 | 0.035 | $-34.87 \pm 0.49$ | 4       |
| RFM@19 | 0.01 | 0.14 | 1.03 | 0.034 | $-52.06 \pm 0.48$ | 4       |
| RFM@20 | 0.02 | 0.25 | 1.04 | 0.026 | $-37.17 \pm 0.44$ | 4       |
| RFM@21 | 0.01 | 0.20 | 1.04 | 0.028 | $-41.96 \pm 0.45$ | 4       |
| RFM@22 | 0.03 | 0.46 | 1.05 | 0.025 | $-36.18 \pm 0.43$ | 4       |
| 0520@8 | 0.07 |      | 1.05 | 0.013 | $-30.98 \pm 0.38$ | STD     |
| 0520@9 | 0.07 |      | 1.05 | 0.013 | $-31.47 \pm 0.38$ | STD     |
| RFM@23 | 0.02 | 0.37 | 1.04 | 0.021 | $-43.60 \pm 0.41$ | 4       |
| RFM@24 | 0.02 | 0.36 | 1.04 | 0.026 | $-40.97 \pm 0.43$ | 4       |
| RFM@25 | 0.01 | 0.15 | 1.03 | 0.036 | $-47.37 \pm 0.49$ | 4       |
| RFM@26 | 0.01 | 0.17 | 1.04 | 0.031 | $-45.76 \pm 0.46$ | unknown |
| RFM@27 | 0.01 | 0.17 | 1.04 | 0.032 | $-44.05 \pm 0.47$ | unknown |
| RFM@28 | 0.01 | 0.18 | 1.04 | 0.032 | $-43.30 \pm 0.47$ | 6       |
| RFM@29 | 0.02 | 0.36 | 1.04 | 0.027 | $-38.22 \pm 0.44$ | 5       |

|         |      |      |      |       |                   |     |
|---------|------|------|------|-------|-------------------|-----|
| RFM@30  | 0.01 | 0.21 | 1.03 | 0.029 | $-46.03 \pm 0.45$ | 6   |
| 0520@10 | 0.07 |      | 1.05 | 0.017 | $-31.31 \pm 0.40$ | STD |
| 0520@11 | 0.07 |      | 1.05 | 0.013 | $-31.53 \pm 0.38$ | STD |
| RFM@31  | 0.03 | 0.42 | 1.04 | 0.020 | $-41.34 \pm 0.41$ | 5   |
| RFM@32  | 0.01 | 0.19 | 1.04 | 0.030 | $-45.28 \pm 0.46$ | 6   |
| RFM@33  | 0.02 | 0.32 | 1.04 | 0.024 | $-40.71 \pm 0.43$ | 5   |
| RFM@34  | 0.02 | 0.33 | 1.04 | 0.022 | $-41.93 \pm 0.42$ | 5   |
| RFM@35  | 0.02 | 0.23 | 1.03 | 0.034 | $-48.12 \pm 0.48$ | 6   |
| RFM@36  | 0.02 | 0.28 | 1.04 | 0.027 | $-40.17 \pm 0.44$ | 5   |
| RFM@37  | 0.02 | 0.23 | 1.04 | 0.028 | $-45.64 \pm 0.45$ | 6   |
| RFM@38  | 0.03 | 0.43 | 1.05 | 0.020 | $-34.15 \pm 0.41$ | 5   |
| RFM@39  | 0.01 | 0.15 | 1.04 | 0.033 | $-42.89 \pm 0.48$ | 6   |
| 0520@12 | 0.07 |      | 1.05 | 0.013 | $-30.84 \pm 0.38$ | STD |
| 0520@13 | 0.07 |      | 1.05 | 0.013 | $-30.86 \pm 0.38$ | STD |
| RFM@40  | 0.02 | 0.25 | 1.04 | 0.036 | $-43.79 \pm 0.50$ | 6   |
| RFM@41  | 0.01 | 0.21 | 1.04 | 0.027 | $-43.16 \pm 0.44$ | 5   |
| RFM@42  | 0.01 | 0.19 | 1.04 | 0.029 | $-45.25 \pm 0.45$ | 5   |
| RFM@43  | 0.01 | 0.20 | 1.04 | 0.035 | $-45.11 \pm 0.49$ | 6   |
| RFM@44  | 0.03 | 0.48 | 1.05 | 0.018 | $-35.34 \pm 0.40$ | 5   |
| RFM@45  | 0.01 | 0.21 | 1.04 | 0.038 | $-45.71 \pm 0.51$ | 6   |
| RFM@46  | 0.02 | 0.27 | 1.04 | 0.032 | $-42.42 \pm 0.47$ | 5   |
| RFM@47  | 0.02 | 0.30 | 1.04 | 0.026 | $-42.22 \pm 0.44$ | 5   |
| RFM@48  | 0.02 | 0.26 | 1.04 | 0.025 | $-43.16 \pm 0.43$ | 6   |

|         |      |      |      |       |                   |     |
|---------|------|------|------|-------|-------------------|-----|
| RFM@49  | 0.02 | 0.28 | 1.04 | 0.024 | $-40.27 \pm 0.43$ | 5   |
| 0520@14 | 0.07 |      | 1.05 | 0.014 | $-30.48 \pm 0.39$ | STD |
| 0520@15 | 0.07 |      | 1.05 | 0.013 | $-31.01 \pm 0.38$ | STD |
| RFM@50  | 0.01 | 0.20 | 1.04 | 0.028 | $-43.04 \pm 0.45$ | 6   |
| RFM@51  | 0.02 | 0.26 | 1.04 | 0.025 | $-42.92 \pm 0.43$ | 5   |
| RFM@52  | 0.02 | 0.26 | 1.04 | 0.032 | $-42.20 \pm 0.47$ | 5   |
| RFM@53  | 0.02 | 0.24 | 1.04 | 0.026 | $-41.96 \pm 0.44$ | 6   |
| RFM@54  | 0.03 | 0.42 | 1.04 | 0.023 | $-42.41 \pm 0.42$ | 5   |
| RFM@55  | 0.02 | 0.27 | 1.04 | 0.025 | $-44.51 \pm 0.43$ | 6   |
| RFM@56  | 0.02 | 0.22 | 1.04 | 0.034 | $-43.78 \pm 0.48$ | 5   |
| RFM@57  | 0.01 | 0.21 | 1.04 | 0.029 | $-45.32 \pm 0.45$ | 6   |
| 0520@16 | 0.07 |      | 1.05 | 0.013 | $-31.07 \pm 0.38$ | STD |
| RFM@58  | 0.02 | 0.36 | 1.05 | 0.024 | $-33.27 \pm 0.43$ | 5   |
| RFM@59  | 0.02 | 0.24 | 1.04 | 0.035 | $-39.88 \pm 0.49$ | 6   |
| RFM@60  | 0.02 | 0.25 | 1.04 | 0.025 | $-39.17 \pm 0.43$ | 5   |
| RFM@61  | 0.02 | 0.33 | 1.04 | 0.031 | $-38.89 \pm 0.47$ | 5   |
| RFM@62  | 0.02 | 0.27 | 1.04 | 0.038 | $-45.69 \pm 0.51$ | 6   |
| RFM@63  | 0.03 | 0.39 | 1.04 | 0.021 | $-39.76 \pm 0.41$ | 5   |
| RFM@64  | 0.02 | 0.30 | 1.04 | 0.023 | $-39.43 \pm 0.42$ | 6   |
| RFM@65  | 0.02 | 0.33 | 1.05 | 0.022 | $-35.75 \pm 0.42$ | 5   |
| 0520@18 | 0.07 |      | 1.05 | 0.013 | $-30.69 \pm 0.38$ | STD |
| 0520@19 | 0.07 |      | 1.05 | 0.014 | $-30.95 \pm 0.39$ | STD |
| RFM@66  | 0.02 | 0.36 | 1.05 | 0.021 | $-32.66 \pm 0.42$ | 5   |

|         |      |      |      |       |                   |     |
|---------|------|------|------|-------|-------------------|-----|
| RFM@67  | 0.03 | 0.42 | 1.05 | 0.020 | $-34.76 \pm 0.41$ | 6   |
| RFM@68  | 0.02 | 0.30 | 1.04 | 0.026 | $-43.84 \pm 0.43$ | 5   |
| RFM@69  | 0.01 | 0.19 | 1.04 | 0.031 | $-41.25 \pm 0.47$ | 6   |
| RFM@70  | 0.02 | 0.27 | 1.04 | 0.028 | $-43.05 \pm 0.45$ | 5   |
| RFM@71  | 0.02 | 0.31 | 1.04 | 0.023 | $-38.92 \pm 0.42$ | 5   |
| RFM@72  | 0.01 | 0.20 | 1.04 | 0.028 | $-42.39 \pm 0.45$ | 6   |
| RFM@73  | 0.02 | 0.28 | 1.04 | 0.024 | $-39.50 \pm 0.43$ | 5   |
| 0520@20 | 0.07 |      | 1.05 | 0.013 | $-30.65 \pm 0.38$ | STD |
| 0520@21 | 0.06 |      | 1.05 | 0.013 | $-31.83 \pm 0.38$ | STD |
| RFM@74  | 0.02 | 0.32 | 1.04 | 0.025 | $-40.33 \pm 0.43$ | 5   |
| RFM@75  | 0.01 | 0.20 | 1.04 | 0.032 | $-45.04 \pm 0.47$ | 6   |
| RFM@76  | 0.03 | 0.41 | 1.04 | 0.020 | $-37.33 \pm 0.41$ | 5   |
| RFM@77  | 0.02 | 0.24 | 1.03 | 0.035 | $-46.76 \pm 0.49$ | 6   |
| RFM@78  | 0.02 | 0.33 | 1.04 | 0.023 | $-38.50 \pm 0.42$ | 5   |
| RFM@79  | 0.02 | 0.31 | 1.04 | 0.026 | $-44.32 \pm 0.43$ | 6   |
| RFM@80  | 0.02 | 0.36 | 1.04 | 0.022 | $-42.22 \pm 0.41$ | 5   |
| RFM@81  | 0.02 | 0.37 | 1.05 | 0.021 | $-35.52 \pm 0.42$ | 5   |
| 0520@22 | 0.07 |      | 1.05 | 0.014 | $-31.00 \pm 0.39$ | STD |
| 0520@23 | 0.07 |      | 1.05 | 0.015 | $-31.24 \pm 0.39$ | STD |
| RFM@82  | 0.01 | 0.18 | 1.05 | 0.030 | $-36.51 \pm 0.46$ | 1   |
| RFM@83  | 0.01 | 0.18 | 1.03 | 0.030 | $-46.43 \pm 0.46$ | 1   |
| RFM@84  | 0.02 | 0.31 | 1.04 | 0.031 | $-38.56 \pm 0.47$ | 1   |
| RFM@85  | 0.01 | 0.21 | 1.04 | 0.028 | $-40.37 \pm 0.45$ | 1   |

|         |      |      |      |       |                   |     |
|---------|------|------|------|-------|-------------------|-----|
| RFM@86  | 0.02 | 0.23 | 1.04 | 0.028 | $-41.12 \pm 0.45$ | 1   |
| RFM@87  | 0.03 | 0.39 | 1.05 | 0.021 | $-33.65 \pm 0.41$ | 1   |
| RFM@88  | 0.01 | 0.21 | 1.04 | 0.028 | $-41.43 \pm 0.45$ | 1   |
| RFM@89  | 0.01 | 0.20 | 1.04 | 0.028 | $-40.40 \pm 0.45$ | 1   |
| 0520@24 | 0.07 |      | 1.05 | 0.013 | $-30.51 \pm 0.38$ | STD |
| 0520@25 | 0.07 |      | 1.05 | 0.013 | $-31.22 \pm 0.38$ | STD |

---

9

10
